# Supplementary material
Source: PubMed Central journal article supplement (PMC7093766)
Supplement: jama-323-1151-s001.pdf [file jama-323-1151-s001.pdf]

## Supplementary Online Content

Saint-Maurice PF, Troiano RP, Bassett DR Jr, et al. Association of daily step count and step intensity with mortality among US adults. *JAMA*. doi:10.1001/jama.2020.1382

**Table S1.** Comparison between those in the analytic sample (Accelerometer) and those who did not wear the device or who did not have at least one valid wear day (No accelerometer)

**Table S2.** Evaluation of model fit (C statistic) comparing covariate adjusted model 1 to model 2 with additional adjustment for steps/day

**Table S3.** Adjusted hazard ratios and mortality rates for all-cause mortality

**Table S4.** Adjusted hazard ratios and mortality rates for all-cause mortality, by sex

**Table S5.** Adjusted hazard ratios and mortality rates for all-cause mortality, by age group

**Table S6.** Adjusted hazard ratios and mortality rates for all-cause mortality, by race-ethnicity

**Table S7.** Association between stepping intensity and all-cause mortality

**Table S8.** Adjusted hazard ratios for all-cause mortality across quartiles of step intensity using walking bout cadence, peak 30-min cadence, and peak 1-min cadence – men

**Table S9.** Adjusted hazard ratios for all-cause mortality across quartiles of step intensity using walking bout cadence, peak 30-min cadence, and peak 1-min cadence – women

**Table S10.** Adjusted hazard ratios for all-cause mortality across quartiles of step intensity using walking bout cadence, peak 30-min cadence, and peak 1-min cadence – age 40-49 years

**Table S11.** Adjusted hazard ratios for all-cause mortality across quartiles of step intensity using walking bout cadence, peak 30-min cadence, and peak 1-min cadence – age 50-64 years

**Table S12.** Adjusted hazard ratios for all-cause mortality across quartiles of step intensity using walking bout cadence, peak 30-min cadence, and peak 1-min cadence – age 65+ years

**Table S13.** Correlation matrix for stepping intensity and total steps per day

**Table S14.** All-cause mortality rates (per 1,000 adults/year) for the joint associations between steps per day and stepping intensity

**Table S15.** Adjusted hazard ratios and mortality rates for CVD and Cancer mortality

**Table S16.** Adjusted hazard ratios for cardiovascular disease mortality across quartiles of stepping intensity

**Table S17.** Adjusted hazard ratios for cancer mortality across quartiles of stepping intensity

**Table S18.** Adjusted hazard ratios for steps per day and mortality (8000 vs. 4000 steps/day) in the analytic sample and in complete case analysis\*

**Table S19.** Adjusted hazard ratios for stepping intensity and all-cause mortality (Quartile 4 vs. 1) in the analytic sample and in complete case analysis\*

**Figure S1.** Adjusted hazard ratios for all-cause mortality stratified by education and behavioral risk factors (smoking, alcohol consumption, and healthy eating index).

**Figure S2.** Adjusted hazard ratios for all-cause mortality stratified by prevalent comorbid conditions.

**Figure S3.** Adjusted hazard ratios for all-cause mortality stratified by mobility limitation, self-reported general health, ability to accumulate extended stepping bouts, and length of follow-up.

**Figure S4.** Adjusted hazard ratios for all-cause mortality among adults with and without imputed steps.

This supplementary material has been provided by the authors to give readers additional information about their work.

Table S1. Comparison between those in the analytic sample (Accelerometer) and those who did not wear the device or who did not have at least one valid wear day (No accelerometer)

|                                              | Accelerometer<br>(n=4,840) | No accelerometer<br>(n=1,515) | Difference<br>(Accel - No Accel) | p <sup>2</sup> |
|----------------------------------------------|----------------------------|-------------------------------|----------------------------------|----------------|
|                                              | <b>Mean (SE)</b>           | <b>Mean (SE)</b>              |                                  |                |
| <b>Age (years)</b>                           | 56.8 (0.4)                 | 58.1 (1.3)                    | -1.3                             | 0.07           |
| <b>BMI (kg/m2)</b>                           | 28.9 (0.1)                 | 28.8 (0.3)                    | 0.1                              | 0.43           |
|                                              |                            |                               |                                  |                |
|                                              | <b>% (SE)</b>              | <b>% (SE)</b>                 |                                  |                |
| <b>Sex (male)</b>                            | 46.5 (0.9)                 | 49.1 (1.8)                    | -2.6                             | 0.27           |
| <b>Ethnicity (Non-Hispanic black)</b>        | 10.2 (1.3)                 | 11.2 (1.3)                    | -1.0                             | 0.38           |
| <b>BMI Status (Obese)</b>                    | 35.9 (1.0)                 | 32.4 (1.7)                    | 3.5                              | <0.001         |
| <b>Education (Less than high school)</b>     | 17.4 (1.2)                 | 23.2 (1.5)                    | -5.8                             | <0.001         |
| <b>Alcohol consumption (Current)</b>         | 66.9 (1.7)                 | 57.2 (1.7)                    | 9.7                              | <0.001         |
| <b>Smoking habits (Current)</b>              | 21.1 (0.9)                 | 21.7 (1.3)                    | -0.6                             | 0.77           |
| <b>Diabetes mellitus (Yes)</b>               | 11.2 (0.6)                 | 13.1 (1.4)                    | -1.9                             | 0.16           |
| <b>Stroke (Yes)</b>                          | 3.9 (0.4)                  | 6.2 (0.7)                     | -2.3                             | 0.003          |
| <b>Coronary heart disease (Yes)</b>          | 5.4 (0.4)                  | 7.2 (1.0)                     | -1.8                             | 0.002          |
| <b>Chronic bronchitis (Yes – current)</b>    | 3.9 (0.3)                  | 4.6 (0.6)                     | -0.7                             | 0.55           |
| <b>Emphysema (Yes)</b>                       | 2.7 (0.4)                  | 3.1 (0.7)                     | -0.4                             | 0.54           |
| <b>Heart failure (Yes)</b>                   | 3.8 (0.3)                  | 4.9 (0.7)                     | -1.1                             | 0.03           |
| <b>Mobility limitation (Yes)<sup>1</sup></b> | 22.2 (1.0)                 | 31.2 (1.8)                    | -9.0                             | <0.001         |
| <b>Cancer/Malignancy (Yes)</b>               | 12.9 (0.6)                 | 10.9 (1.1)                    | 2.0                              | 0.12           |
| <b>General health (Fair/Poor)</b>            | 18.4 (1.1)                 | 20.2 (1.3)                    | -1.8                             | <0.001         |

Percentages, means, and confidence intervals are estimated using US population weights.

<sup>1</sup>Mobility limitation was assessed among those 60+ years of age, or younger individuals reporting some type of physical or mental limitation. Mobility limitation was defined as a report of having difficulty walking for a quarter mile, without special equipment, or walking up ten steps

<sup>2</sup>p-values indicate statistically significant differences between accelerometer vs. no accelerometer groups if p<0.05.

Table S2. Evaluation of model fit (C statistic) comparing covariate adjusted model 1 to model 2 with additional adjustment for steps/day

|         | C statistic |
|---------|-------------|
| Model 1 | 0.787       |
| Model 2 | 0.824       |

Model 1 – age, diet quality, sex, race-ethnicity, BMI, education, alcohol consumption, smoking status, diabetes, stroke, coronary heart disease, heart failure, cancer, chronic bronchitis, emphysema, mobility limitation, and self-reported general health.

Model 2 – Model 1 + steps/day

Table S3. Adjusted hazard ratios and mortality rates for all-cause mortality

| Steps/day | Hazard ratios (95% CI)   |
|-----------|--------------------------|
| 2000      | 1.51 (1.41, 1.62)        |
| 4000      | REFERENT                 |
| 6000      | 0.68 (0.64, 0.72)        |
| 8000      | 0.49 (0.44, 0.55)        |
| 10000     | 0.40 (0.34, 0.46)        |
| 12000     | 0.35 (0.28, 0.45)        |
| 14000     | 0.34 (0.28, 0.45)        |
| 16000     | 0.34 (0.21, 0.56)        |
| p trend   | <0.001                   |
|           |                          |
| Steps/day | Mortality rates (95% CI) |
| 2000      | 21.7 (19.4, 23.9)        |
| 4000      | 14.4 (13.0, 15.7)        |
| 6000      | 9.7 (8.6, 10.8)          |
| 8000      | 7.1 (5.7, 8.4)           |
| 10000     | 5.7 (4.4, 7.0)           |
| 12000     | 5.1 (3.8, 6.5)           |
| 14000     | 4.9 (2.9, 6.9)           |
| 16000     | 4.9 (2.0, 7.8)           |

Hazard ratios and mortality rates were adjusted for age, diet quality, sex, race-ethnicity, BMI, education, alcohol consumption, smoking status, diabetes, stroke, coronary heart disease, heart failure, cancer, chronic bronchitis, emphysema, mobility limitation, and self-reported general health. Estimated hazard ratios were computed using a cox proportional hazards model with restricted cubic spline functions using 3 knots (at 5<sup>th</sup>, 50<sup>th</sup>, and 95<sup>th</sup> of US weighted percentiles for steps per day equivalent to approximately 3 000, 9 000, and 16 000 steps per day). The ~10<sup>th</sup> percentile was set as the referent group (referent=4 000 steps/day). Mortality rates were computed using the 2003 mortality rate for US adults (11.4 deaths per 1000 adults/year). Models included US population and study design weights to account for the complex survey design in NHANES. All models were replicated 5 times to account for imputed steps generated in ~14% of the sample.

Table S4. Adjusted hazard ratios and mortality rates for all-cause mortality by sex

|           | <b>Men</b>               | <b>Women</b>             |
|-----------|--------------------------|--------------------------|
| Steps/day | Hazard ratios (95% CI)   | Hazard ratios (95% CI)   |
| 2000      | 1.49 (1.33, 1.68)        | 1.57 (1.36, 1.82)        |
| 4000      | REFERENT                 | REFERENT                 |
| 6000      | 0.68 (0.62, 0.75)        | 0.66 (0.57, 0.76)        |
| 8000      | 0.48 (0.41, 0.58)        | 0.48 (0.37, 0.62)        |
| 10000     | 0.38 (0.31, 0.45)        | 0.41 (0.29, 0.58)        |
| 12000     | 0.32 (0.26, 0.39)        | 0.40 (0.26, 0.63)        |
| 14000     | 0.28 (0.20, 0.38)        | 0.45 (0.26, 0.77)        |
| 16000     | 0.26 (0.16, 0.41)        | 0.53 (0.27, 1.02)        |
| p trend   | <0.001                   | <0.001                   |
|           |                          |                          |
| Steps/day | Mortality rates (95% CI) | Mortality rates (95% CI) |
| 2000      | 26.2 (22.2, 30.3)        | 18.0 (14.1, 21.9)        |
| 4000      | 17.7 (15.6, 19.7)        | 11.4 (10.3, 12.6)        |
| 6000      | 12.0 (9.4, 14.5)         | 7.6 (6.4, 8.7)           |
| 8000      | 8.6 (5.5, 11.6)          | 5.5 (4.1, 6.8)           |
| 10000     | 6.6 (4.1, 9.2)           | 4.7 (3.3, 6.0)           |
| 12000     | 5.6 (3.5, 7.6)           | 4.7 (2.9, 6.4)           |
| 14000     | 4.9 (2.6, 7.2)           | 5.2 (2.8, 7.5)           |
| 16000     | 4.5 (1.2, 7.9)           | 6.1 (2.2, 10.0)          |

Hazard ratios and mortality rates were adjusted for age, diet quality, race-ethnicity, BMI, education, alcohol consumption, smoking status, diabetes, stroke, coronary heart disease, heart failure, cancer, chronic bronchitis, emphysema, mobility limitation, and self-reported general health. Estimated hazard ratios were computed separately by sex using cox proportional hazards model with restricted cubic spline functions using 3 knots (at 5<sup>th</sup>, 50<sup>th</sup>, and 95<sup>th</sup> of US weighted percentiles for steps per day equivalent to approximately 3 000, 9 000, and 16 000 steps per day). The ~10<sup>th</sup> percentile was set as the referent group (referent=4 000 steps/day). Mortality rates were computed using 2003 mortality rates for US adults by sex (men, 13.0 deaths per 1000 adults/year; women, 9.9 deaths per 1000 adults/year). Models included US population and study design weights to account for the complex survey design in NHANES. All models were replicated 5 times to account for imputed steps generated in ~14% of the sample.

Table S5. Adjusted hazard ratios and mortality rates for all-cause mortality by **age group**

|                  | <b>Age group</b>                |                   |                   |
|------------------|---------------------------------|-------------------|-------------------|
|                  | 40-49 years                     | 50-64 years       | ≥65 years         |
| <b>Steps/day</b> | <b>Hazard ratios (95% CI)</b>   |                   |                   |
| 2000             | 1.35 (0.98, 1.86)               | 1.72 (1.36, 2.17) | 1.78 (1.61, 1.97) |
| 4000             | REFERENT                        | REFERENT          | REFERENT          |
| 6000             | 0.75 (0.56, 1.00)               | 0.60 (0.48, 0.75) | 0.58 (0.53, 0.64) |
| 8000             | 0.58 (0.35, 0.96)               | 0.39 (0.27, 0.58) | 0.38 (0.32, 0.44) |
| 10000            | 0.47 (0.26, 0.87)               | 0.30 (0.18, 0.50) | 0.29 (0.23, 0.36) |
| 12000            | 0.41 (0.22, 0.76)               | 0.26 (0.14, 0.49) | 0.26 (0.19, 0.35) |
| 14000            | 0.37 (0.19, 0.71)               | 0.25 (0.12, 0.54) | 0.27 (0.18, 0.40) |
| 16000            | 0.34 (0.16, 0.72)               | 0.26 (0.10, 0.66) | 0.29 (0.16, 0.51) |
| p trend          | 0.004                           | 0.004             | <0.001            |
|                  |                                 |                   |                   |
| <b>Steps/day</b> | <b>Mortality rates (95% CI)</b> |                   |                   |
| 2000             | 7.6 (2.4, 12.9)                 | 39.0 (21.6, 56.3) | 78.4 (67.8, 88.9) |
| 4000             | 5.6 (2.5, 8.8)                  | 18.1 (10.0, 26.2) | 44.0 (41.2, 46.8) |
| 6000             | 4.2 (2.9, 5.5)                  | 8.8 (6.2, 11.3)   | 25.8 (23.0, 28.6) |
| 8000             | 3.3 (2.4, 4.2)                  | 4.9 (2.5, 7.3)    | 16.5 (14.4, 18.6) |
| 10000            | 2.7 (1.8, 3.5)                  | 3.4 (1.2, 5.6)    | 12.9 (10.1, 15.7) |
| 12000            | 2.3 (1.3, 3.3)                  | 2.9 (0.7, 5.1)    | 11.5 (5.8, 17.1)  |
| 14000            | 2.1 (0.5, 3.7)                  | 2.8 (0.2, 5.4)    | 11.8 (2.7, 20.9)  |
| 16000            | 1.9 (0.0, 4.2)                  | 3.1 (0.0, 6.2)    | 12.5 (0.6, 24.4)  |

Hazard ratios and mortality rates were adjusted for diet quality, sex, race-ethnicity, BMI, education, alcohol consumption, smoking status, diabetes, stroke, coronary heart disease, heart failure, cancer, chronic bronchitis, emphysema, mobility limitation, and self-reported general health. Estimated hazard ratios were computed separately by age group using cox proportional hazards model with restricted cubic spline functions using 3 knots (at 5<sup>th</sup>, 50<sup>th</sup>, and 95<sup>th</sup> of US weighted percentiles for steps per day equivalent to approximately 3 000, 9 000, and 16 000 steps per day). The ~10<sup>th</sup> percentile was set as the referent group (referent=4 000 steps/day). Mortality rates were computed using 2003 mortality rates for US adults by age group (40-49 years, 3.1 deaths per 1000 adults/year; 50-64 years, 9.4 deaths per 1000 adults/year; 65+ yrs, 35.8 deaths per 1000 adults/year). Models included US population and study design weights to account for the complex survey design in NHANES. All models were replicated 5 times to account for imputed steps generated in ~14% of the sample.

Table S6. Adjusted hazard ratios and mortality rates for all-cause mortality by **race-ethnicity**

| Steps/day | Race-ethnicity           |                    |                   |
|-----------|--------------------------|--------------------|-------------------|
|           | Non-Hispanic White       | Non-Hispanic Black | Mexican-American  |
|           | Hazard ratios (95% CI)   |                    |                   |
| 2000      | 1.53 (1.39, 1.68)        | 1.59 (1.37, 1.85)  | 1.25 (0.99, 1.58) |
| 4000      | REFERENT                 | REFERENT           | REFERENT          |
| 6000      | 0.67 (0.62, 0.73)        | 0.65 (0.56, 0.74)  | 0.81 (0.65, 1.00) |
| 8000      | 0.48 (0.42, 0.55)        | 0.45 (0.35, 0.59)  | 0.66 (0.45, 0.98) |
| 10000     | 0.38 (0.32, 0.46)        | 0.37 (0.26, 0.51)  | 0.56 (0.34, 0.93) |
| 12000     | 0.34 (0.25, 0.47)        | 0.34 (0.23, 0.51)  | 0.50 (0.28, 0.86) |
| 14000     | 0.33 (0.19, 0.55)        | 0.35 (0.22, 0.55)  | 0.44 (0.24, 0.81) |
| 16000     | 0.33 (0.15, 0.70)        | 0.37 (0.22, 0.64)  | 0.40 (0.21, 0.78) |
| p trend   | <0.001                   | <0.001             | 0.02              |
|           | Mortality rates (95% CI) |                    |                   |
| 2000      | 18.8 (16.5, 21.2)        | 26.7 (20.8, 32.6)  | 10.1 (5.6, 14.6)  |
| 4000      | 12.3 (10.9, 13.7)        | 16.8 (14.4, 19.2)  | 8.1 (4.1, 12.0)   |
| 6000      | 8.2 (7.0, 9.4)           | 10.9 (9.0, 12.8)   | 6.5 (5.1, 7.9)    |
| 8000      | 5.9 (4.5, 7.3)           | 7.6 (5.4, 9.7)     | 5.3 (2.8, 7.9)    |
| 10000     | 4.7 (3.1, 6.3)           | 6.2 (3.8, 8.6)     | 4.6 (1.8, 7.3)    |
| 12000     | 4.2 (2.4, 6.0)           | 5.6 (3.2, 8.1)     | 4.0 (1.8, 6.2)    |
| 14000     | 4.0 (1.3, 6.8)           | 5.8 (3.4, 8.2)     | 3.6 (2.0, 5.1)    |
| 16000     | 4.0 (0.1, 7.9)           | 6.2 (3.5, 8.9)     | 3.2 (1.7, 4.8)    |

Hazard ratios and mortality rates were adjusted for age, diet quality, sex, BMI, education, alcohol consumption, smoking status, diabetes, stroke, coronary heart disease, heart failure, cancer, chronic bronchitis, emphysema, mobility limitation, and self-reported general health. Estimated hazard ratios were computed separately by race/ethnicity using cox proportional hazards model with restricted cubic spline functions using 3 knots (at 5<sup>th</sup>, 50<sup>th</sup>, and 95<sup>th</sup> of US weighted percentiles for steps per day equivalent to approximately 3 000, 9 000, and 16 000 steps per day). The ~10<sup>th</sup> percentile was set as the referent group (referent=4 000 steps/day). Mortality rates were computed using 2003 mortality rates for US adults by ethnicity (non-Hispanic Whites, 10.0 deaths per 1000 adults/year; non-Hispanic Blacks, 13.8 deaths per 1000 adults/year; Mexican-Americans, 5.6 deaths per 1000 adults/year). Models included US population and study design weights to account for the complex survey design in NHANES. All models were replicated 5 times to account for imputed steps generated in ~14% of the sample.



Table S7. Association between stepping intensity and all-cause mortality: hazard ratios and mortality rates (per 1,000 adults/year)

|                                           |                   | Quartiles        |                   |                   |                   |         |
|-------------------------------------------|-------------------|------------------|-------------------|-------------------|-------------------|---------|
|                                           |                   | 1                | 2                 | 3                 | 4                 |         |
| <b>Bout cadence (steps per minute)</b>    | No bouts          | 60-76.0          | 76.1-81.0         | 81.1-88.5         | >88.5             |         |
|                                           | (n=496)           | (n=1,129)        | (n=1,023)         | (n=1,116)         | (n=1,076)         | p trend |
| <b>N deaths</b>                           | 320               | 277              | 183               | 215               | 170               |         |
| <b>Hazard ratios</b> Model 1              | 2.15 (1.83, 2.52) | 1.00 (REF)       | 0.91 (0.71, 1.18) | 1.01 (0.82, 1.23) | 0.95 (0.77, 1.17) | 0.80    |
| Model 2                                   | 1.72 (1.42, 2.08) | 1.00 (REF)       | 0.95 (0.73, 1.24) | 1.05 (0.85, 1.29) | 1.07 (0.88, 1.29) | 0.61    |
| <b>Mortality rates</b> Model 1            | 18.5 (17.1, 19.8) | 8.7 (6.2, 11.1)  | 7.9 (5.9, 9.9)    | 8.7 (5.8, 11.6)   | 8.2 (5.3, 11.1)   |         |
| Model 2                                   | 16.0 (14.4, 17.5) | 9.4 (6.9, 11.8)  | 8.9 (6.9, 10.9)   | 9.7 (6.6, 12.8)   | 9.9 (6.3, 13.5)   |         |
|                                           |                   |                  |                   |                   |                   |         |
| <b>Peak 30 cadence (steps per minute)</b> | No bouts          | 0-56.0           | 56.1-69.2         | 69.3-82.8         | >82.8             |         |
|                                           | (n=496)           | (n=1,080)        | (n=1,153)         | (n=1,074)         | (n=1,037)         | p trend |
| <b>N deaths</b>                           | 320               | 406              | 207               | 124               | 108               |         |
| <b>Hazard ratios</b> Model 1              | 1.91 (1.57, 2.31) | 1.00 (REF)       | 0.74 (0.61, 0.89) | 0.59 (0.41, 0.85) | 0.52 (0.37, 0.74) | <0.001  |
| Model 2                                   | 1.69 (1.37, 2.08) | 1.00 (REF)       | 0.91 (0.76, 1.10) | 0.86 (0.66, 1.23) | 0.90 (0.65, 1.27) | 0.34    |
| <b>Mortality rates</b> Model 1            | 19.0 (17.7, 20.4) | 10.0 (7.1, 12.9) | 7.4 (5.0, 9.9)    | 5.9 (3.5, 8.4)    | 5.2 (3.2, 7.3)    |         |
| Model 2                                   | 15.7 (14.2, 17.3) | 9.4 (6.9, 11.8)  | 8.6 (5.6, 11.50)  | 8.0 (4.6, 11.3)   | 8.4 (4.0, 12.9)   |         |
|                                           |                   |                  |                   |                   |                   |         |
| <b>Peak 1 cadence (steps per minute)</b>  | No bouts          | 0-89.9           | 90.0-101.9        | 102.0-112.4       | >112.4            |         |
|                                           | (n=496)           | (n=1,055)        | (n=1,141)         | (n=1,065)         | (n=1,083)         | p trend |
| <b>N deaths</b>                           | 320               | 351              | 226               | 146               | 122               |         |
| <b>Hazard ratios</b> Model 1              | 2.01 (1.68, 2.40) | 1.00 (REF)       | 0.87 (0.71, 1.05) | 0.74 (0.55, 1.00) | 0.74 (0.55, 0.98) | 0.04    |
| Model 2                                   | 1.71 (1.39, 2.11) | 1.00 (REF)       | 1.02 (0.85, 1.23) | 0.97 (0.74, 1.28) | 1.10 (0.81, 1.49) | 0.80    |
| <b>Mortality rates</b> Model 1            | 18.4 (17.0, 19.7) | 9.1 (6.2, 12.0)  | 8.0 (5.3, 10.7)   | 6.7 (4.3, 9.2)    | 6.7 (4.5, 9.0)    |         |
| Model 2                                   | 15.1 (13.3, 16.8) | 8.9 (6.2, 11.6)  | 9.0 (6.1, 11.9)   | 8.6 (5.2, 11.9)   | 9.7 (6.1, 13.3)   |         |

Step intensity was defined using quartiles of: Bout cadence: average steps per minute in a day in bouts of 2 consecutive minutes or greater; Peak 30 cadence: average steps per minute recorded for the 30 highest minutes in a day (not required to be consecutive); Peak 1 cadence: average steps per minute recorded for the highest minute in a day

No bouts – No bouts of 2 consecutive minutes or greater; 496 participants did not accumulate a single bout of 2 consecutive minutes or greater and were flagged for each stepping intensity metric results in order to facilitate direct comparisons.

Model 1 – age, diet quality, sex, race-ethnicity, BMI, education, alcohol consumption, smoking status, diabetes, stroke, coronary heart disease, heart failure, cancer, chronic bronchitis, emphysema, mobility limitation, self-reported general health, and stepping intensity

Model 2 – Model 1 + steps per day (continuous)

P trend was computed separately for model 1 and 2 and did not include the no bout group.

Table S8. Adjusted hazard ratios for all-cause mortality across quartiles of step intensity using walking bout cadence, peak 30-min cadence, and peak 1-min cadence – **men**.

| Quartiles                          |                   | 1          | 2                 | 3                 | 4                 |         |
|------------------------------------|-------------------|------------|-------------------|-------------------|-------------------|---------|
| Bout cadence (steps per minute)    | No bouts          | 60-75.4    | 75.5-79.6         | 79.7-85.8         | >85.8             |         |
|                                    | (n=178)           | (n=777)    | (n=672)           | (n=430)           | (n=348)           | p trend |
| N deaths                           | 140               | 220        | 156               | 98                | 66                |         |
| Model 1                            | 2.42 (1.86, 3.13) | 1.00 (REF) | 1.10 (0.85, 1.41) | 1.08 (0.82, 1.43) | 0.79 (0.60, 1.04) | 0.38    |
| Model 2                            | 1.74 (1.32, 2.30) | 1.00 (REF) | 1.12 (0.88, 1.44) | 1.11 (0.84, 1.47) | 0.88 (0.69, 1.13) | 0.74    |
| Peak 30 cadence (steps per minute) | No bouts          | 0-59.9     | 60.0-72.2         | 72.3-84.4         | >84.4             |         |
|                                    | (n=178)           | (n=638)    | (n=561)           | (n=510)           | (n=518)           | p trend |
| N deaths                           | 140               | 283        | 116               | 80                | 61                |         |
| Model 1                            | 1.98 (1.50, 2.62) | 1.00 (REF) | 0.64 (0.49, 0.83) | 0.66 (0.44, 1.01) | 0.40 (0.28, 0.58) | <0.001  |
| Model 2                            | 1.64 (1.21, 2.22) | 1.00 (REF) | 0.82 (0.62, 1.08) | 1.05 (0.69, 1.60) | 0.75 (0.51, 1.10) | 0.43    |
| Peak 1 cadence (steps per minute)  | No bouts          | 0-91.6     | 91.7-101.7        | 101.8-110.8       | >110.8            |         |
|                                    | (n=178)           | (n=613)    | (n=550)           | (n=500)           | (n=564)           | p trend |
| N deaths                           | 140               | 252        | 124               | 87                | 77                |         |
| Model 1                            | 2.09 (1.61, 2.72) | 1.00 (REF) | 0.79 (0.61, 1.03) | 0.71 (0.47, 1.07) | 0.56 (0.43, 0.74) | 0.002   |
| Model 2                            | 1.65 (1.23, 2.28) | 1.00 (REF) | 0.94 (0.70, 1.26) | 0.93 (0.63, 1.39) | 0.88 (0.65, 1.20) | 0.66    |

Step intensity was defined using quartiles of:

Bout cadence: average steps per minute in a day in bouts of 2 consecutive minutes or greater;

Peak 30 cadence: average steps per minute recorded for the 30 highest minutes in a day (not required to be consecutive);

Peak 1 cadence: average steps per minute recorded for the highest minute in a day

No bouts – No bouts of 2 consecutive minutes or greater; 178 male participants did not accumulate a single bout of 2 consecutive minutes or greater and were flagged for each stepping intensity metric results in order to facilitate direct comparisons.

Model 1 – age, diet quality, race-ethnicity, BMI, education, alcohol consumption, smoking status, diabetes, stroke, coronary heart disease, heart failure, cancer, chronic bronchitis, emphysema, mobility limitation, self-reported general health, and stepping intensity

Model 2 – Model 1 + steps per day (continuous)

P trend was computed separately for each model 1 and 2 and did not include the no bout group.

Table S9. Adjusted hazard ratios for all-cause mortality across quartiles of step intensity using walking bout cadence, peak 30-min cadence, and peak 1-min cadence – **women**.

| Quartiles                          |                   | 1          | 2                 | 3                 | 4                 |         |
|------------------------------------|-------------------|------------|-------------------|-------------------|-------------------|---------|
| Bout cadence (steps per minute)    | No bouts          | 60-76.9    | 77.0-83.0         | 83.1-90.6         | >90.6             |         |
|                                    | (n=318)           | (n=520)    | (n=541)           | (n=529)           | (n=527)           | p trend |
| N deaths                           | 180               | 93         | 64                | 78                | 70                |         |
| Model 1                            | 2.27 (1.72, 2.98) | 1.00 (REF) | 0.86 (0.55, 1.33) | 1.19 (0.84, 1.69) | 1.14 (0.83, 1.57) | 0.54    |
| Model 2                            | 1.89 (1.43, 2.51) | 1.00 (REF) | 0.87 (0.56, 1.36) | 1.27 (0.88, 1.83) | 1.28 (0.93, 1.74) | 0.33    |
| Peak 30 cadence (steps per minute) | No bouts          | 0-52.7     | 52.8-66.0         | 66.1-81.0         | >81.0             |         |
|                                    | (n=318)           | (n=471)    | (n=584)           | (n=555)           | (n=507)           | p trend |
| N deaths                           | 180               | 143        | 78                | 42                | 42                |         |
| Model 1                            | 1.99 (1.59, 2.49) | 1.00 (REF) | 0.91 (0.65, 1.28) | 0.49 (0.28, 0.86) | 0.78 (0.43, 1.39) | 0.17    |
| Model 2                            | 1.80 (1.42, 2.28) | 1.00 (REF) | 1.06 (0.76, 1.49) | 0.64 (0.38, 1.10) | 1.21 (0.73, 2.02) | 0.32    |
| Peak 1 cadence (steps per minute)  | No bouts          | 0-87.6     | 87.7-102.3        | 102.4-113.8       | >113.8            |         |
|                                    | (n=318)           | (n=471)    | (n=565)           | (n=539)           | (n=542)           | p trend |
| N deaths                           | 180               | 116        | 84                | 56                | 49                |         |
| Model 1                            | 2.15 (1.65, 2.81) | 1.00 (REF) | 1.01 (0.70, 1.45) | 0.78 (0.47, 1.32) | 0.97 (0.62, 1.53) | 0.61    |
| Model 2                            | 1.89 (1.41, 2.52) | 1.00 (REF) | 1.14 (0.82, 1.58) | 0.98 (0.59, 1.61) | 1.34 (0.88, 2.02) | 0.76    |

Step intensity was defined using quartiles of:

Bout cadence: average steps per minute in a day in bouts of 2 consecutive minutes or greater;

Peak 30 cadence: average steps per minute recorded for the 30 highest minutes in a day (not required to be consecutive);

Peak 1 cadence: average steps per minute recorded for the highest minute in a day

No bouts – No bouts of 2 consecutive minutes or greater; 178 male participants did not accumulate a single bout of 2 consecutive minutes or greater and were flagged for each stepping intensity metric results in order to facilitate direct comparisons.

Model 1 – age, diet quality, race-ethnicity, BMI, education, alcohol consumption, smoking status, diabetes, stroke, coronary heart disease, heart failure, cancer, chronic bronchitis, emphysema, mobility limitation, self-reported general health, and stepping intensity

Model 2 – Model 1 + steps per day (continuous)

P trend was computed separately for each model 1 and 2 and did not include the no bout group.

Table S10. Adjusted hazard ratios for all-cause mortality across quartiles of step intensity using walking bout cadence, peak 30-min cadence, and peak 1-min cadence – age **40-49 years**.

| Quartiles                          |                   | 1          | 2                 | 3                 | 4                 |         |
|------------------------------------|-------------------|------------|-------------------|-------------------|-------------------|---------|
| Bout cadence (steps per minute)    | No bouts          | 60.0-76.8  | 76.9-82.2         | 82.3-89.1         | >89.1             |         |
|                                    | (n=34)            | (n=296)    | (n=316)           | (n=323)           | (n=300)           | p trend |
| N deaths                           | 5                 | 19         | 14                | 15                | 16                |         |
| Model 1                            | 3.53 (1.61, 7.78) | 1.00 (REF) | 0.96 (0.40, 2.31) | 0.89 (0.38, 2.07) | 0.89 (0.40, 1.96) | 0.74    |
| Model 2                            | 2.69 (1.07, 6.80) | 1.00 (REF) | 1.00 (0.41, 2.43) | 0.88 (0.38, 2.05) | 0.88 (0.40, 1.96) | 0.73    |
| Peak 30 cadence (steps per minute) | No bouts          | 0-64.1     | 64.2-75.2         | 75.3-87.6         | >87.6             |         |
|                                    | (n=34)            | (n=305)    | (n=314)           | (n=311)           | (n=305)           | p trend |
| N deaths                           | 5                 | 25         | 11                | 12                | 16                |         |
| Model 1                            | 2.16 (0.96, 4.84) | 1.00 (REF) | 0.20 (0.07, 0.54) | 0.52 (0.23, 1.15) | 0.66 (0.25, 1.74) | 0.13    |
| Model 2                            | 2.04 (0.88, 4.78) | 1.00 (REF) | 0.23 (0.07, 0.72) | 0.62 (0.23, 1.69) | 0.85 (0.25, 2.96) | 0.46    |
| Peak 1 cadence (steps per minute)  | No bouts          | 0-97.9     | 98.0-107.0        | 107.1-116.0       | >116.0            |         |
|                                    | (n=34)            | (n=322)    | (n=291)           | (n=312)           | (n=310)           | p trend |
| N deaths                           | 5                 | 24         | 12                | 12                | 16                |         |
| Model 1                            | 2.81 (1.30, 6.08) | 1.00 (REF) | 0.56 (0.24, 1.32) | 0.52 (0.20, 1.38) | 0.85 (0.34, 2.15) | 0.42    |
| Model 2                            | 2.48 (1.04, 5.89) | 1.00 (REF) | 0.64 (0.26, 1.58) | 0.63 (0.22, 1.79) | 1.07 (0.37, 3.08) | 0.81    |

Step intensity was defined using quartiles of:

Bout cadence: average steps per minute in a day in bouts of 2 consecutive minutes or greater;

Peak 30 cadence: average steps per minute recorded for the 30 highest minutes in a day (not required to be consecutive);

Peak 1 cadence: average steps per minute recorded for the highest minute in a day

No bouts – No bouts of 2 consecutive minutes or greater; 178 male participants did not accumulate a single bout of 2 consecutive minutes or greater and were flagged for each stepping intensity metric results in order to facilitate direct comparisons.

Model 1 – diet quality, sex, race-ethnicity, BMI, education, alcohol consumption, smoking status, diabetes, stroke, coronary heart disease, heart failure, cancer, chronic bronchitis, emphysema, mobility limitation, self-reported general health, and stepping intensity

Model 2 – Model 1 + steps per day (continuous)

P trend was computed separately for each model 1 and 2 and did not include the no bout group.

Table S11. Adjusted hazard ratios for all-cause mortality across quartiles of step intensity using walking bout cadence, peak 30-min cadence, and peak 1-min cadence – age **50-64 years**.

| Quartiles                          |                   | 1          | 2                 | 3                 | 4                 |         |
|------------------------------------|-------------------|------------|-------------------|-------------------|-------------------|---------|
| Bout cadence (steps per minute)    | No bouts          | 60.0-75.8  | 75.9-80.7         | 80.8-88.1         | >88.1             |         |
|                                    | (n=108)           | (n=397)    | (n=391)           | (n=425)           | (n=442)           | p trend |
| N deaths                           | 44                | 53         | 50                | 57                | 42                |         |
| Model 1                            | 2.26 (1.34, 3.83) | 1.00 (REF) | 0.99 (0.64, 1.52) | 1.15 (0.66, 2.01) | 1.04 (0.61, 1.76) | 0.69    |
| Model 2                            | 1.73 (1.02, 2.93) | 1.00 (REF) | 1.05 (0.66, 1.66) | 1.20 (0.70, 2.05) | 1.17 (0.69, 1.98) | 0.45    |
| Peak 30 cadence (steps per minute) | No bouts          | 0-58.7     | 58.8-70.2         | 70.3-82.9         | >82.9             |         |
|                                    | (n=108)           | (n=411)    | (n=407)           | (n=422)           | (n=415)           | p trend |
| N deaths                           | 44                | 86         | 49                | 37                | 30                |         |
| Model 1                            | 1.79 (1.03, 3.10) | 1.00 (REF) | 0.72 (0.38, 1.36) | 0.53 (0.24, 1.17) | 0.49 (0.23, 1.06) | 0.08    |
| Model 2                            | 1.59 (0.89, 2.84) | 1.00 (REF) | 0.97 (0.57, 1.65) | 0.85 (0.45, 1.62) | 1.06 (0.53, 2.11) | 0.68    |
| Peak 1 cadence (steps per minute)  | No bouts          | 0-91.6     | 91.7-102.5        | 102.6-112.0       | >112.0            |         |
|                                    | (n=108)           | (n=410)    | (n=404)           | (n=410)           | (n=431)           | p trend |
| N deaths                           | 44                | 78         | 50                | 40                | 34                |         |
| Model 1                            | 2.11 (1.18, 3.78) | 1.00 (REF) | 0.95 (0.55, 1.63) | 0.88 (0.41, 1.89) | 0.86 (0.45, 1.66) | 0.77    |
| Model 2                            | 1.73 (0.94, 3.21) | 1.00 (REF) | 1.20 (0.72, 2.00) | 1.25 (0.62, 2.51) | 1.44 (0.81, 2.56) | 0.24    |

Step intensity was defined using quartiles of:

Bout cadence: average steps per minute in a day in bouts of 2 consecutive minutes or greater;

Peak 30 cadence: average steps per minute recorded for the 30 highest minutes in a day (not required to be consecutive);

Peak 1 cadence: average steps per minute recorded for the highest minute in a day

No bouts – No bouts of 2 consecutive minutes or greater; 178 male participants did not accumulate a single bout of 2 consecutive minutes or greater and were flagged for each stepping intensity metric results in order to facilitate direct comparisons.

Model 1 – diet quality, sex, race-ethnicity, BMI, education, alcohol consumption, smoking status, diabetes, stroke, coronary heart disease, heart failure, cancer, chronic bronchitis, emphysema, mobility limitation, self-reported general health, and stepping intensity

Model 2 – Model 1 + steps per day (continuous)

P trend was computed separately for each model 1 and 2 and did not include the no bout group.

Table S12. Adjusted hazard ratios for all-cause mortality across quartiles of step intensity using walking bout cadence, peak 30-min cadence, and peak 1-min cadence – age 65+ years.

| Quartiles                          |                   | 1          | 2                 | 3                 | 4                 |         |
|------------------------------------|-------------------|------------|-------------------|-------------------|-------------------|---------|
| Bout cadence (steps per minute)    | No bouts          | 60.0-74.6  | 74.7-80.0         | 80.1-86.7         | >86.7             |         |
|                                    | (n=363)           | (n=385)    | (n=391)           | (n=380)           | (n=417)           | p trend |
| N deaths                           | 277               | 164        | 149               | 151               | 141               |         |
| Model 1                            | 2.66 (2.10, 3.37) | 1.00 (REF) | 0.93 (0.68, 1.25) | 0.96 (0.75, 1.24) | 0.91 (0.72, 1.15) | 0.53    |
| Model 2                            | 1.86 (1.49, 2.32) | 1.00 (REF) | 1.04 (0.79, 1.38) | 1.08 (0.85, 1.38) | 1.18 (0.95, 1.46) | 0.31    |
| Peak 30 cadence (steps per minute) | No bouts          | 0-41.1     | 41.2-55.3         | 55.4-69.9         | >69.9             |         |
|                                    | (n=363)           | (n=204)    | (n=431)           | (n=475)           | (n=463)           | p trend |
| N deaths                           | 277               | 114        | 206               | 157               | 128               |         |
| Model 1                            | 1.73 (1.30, 2.30) | 1.00 (REF) | 0.72 (0.53, 0.97) | 0.45 (0.33, 0.62) | 0.35 (0.25, 0.51) | <0.001  |
| Model 2                            | 1.66 (1.27, 2.17) | 1.00 (REF) | 0.93 (0.67, 1.31) | 0.80 (0.51, 1.26) | 0.89 (0.53, 1.48) | 0.36    |
| Peak 1 cadence (steps per minute)  | No bouts          | 0-74.6     | 74.7-91.0         | 91.1-104.5        | >104.5            |         |
|                                    | (n=363)           | (n=215)    | (n=429)           | (n=455)           | (n=474)           | p trend |
| N deaths                           | 277               | 103        | 201               | 161               | 140               |         |
| Model 1                            | 2.37 (1.77, 3.18) | 1.00 (REF) | 1.01 (0.71, 1.44) | 0.74 (0.52, 1.05) | 0.60 (0.40, 0.88) | 0.01    |
| Model 2                            | 2.04 (1.57, 2.66) | 1.00 (REF) | 1.30 (0.91, 1.84) | 1.18 (0.82, 1.72) | 1.22 (0.75, 1.98) | 0.48    |

Step intensity was defined using quartiles of:

Bout cadence: average steps per minute in a day in bouts of 2 consecutive minutes or greater;

Peak 30 cadence: average steps per minute recorded for the 30 highest minutes in a day (not required to be consecutive);

Peak 1 cadence: average steps per minute recorded for the highest minute in a day

No bouts – No bouts of 2 consecutive minutes or greater; 178 male participants did not accumulate a single bout of 2 consecutive minutes or greater and were flagged for each stepping intensity metric results in order to facilitate direct comparisons.

Model 1 – age, diet quality, sex, race-ethnicity, BMI, education, alcohol consumption, smoking status, diabetes, stroke, coronary heart disease, heart failure, cancer, chronic bronchitis, emphysema, mobility limitation, self-reported general health, and stepping intensity

Model 2 – Model 1 + steps per day (continuous)

P trend was computed separately for each model 1 and 2 and did not include the no bout group.

Table S13. Correlation matrix for stepping intensity and total steps per day

|                 | Bout cadence | Peak 30 cadence | Peak 1 cadence | Total steps/day |
|-----------------|--------------|-----------------|----------------|-----------------|
| Bout cadence    | 1            | 0.62            | 0.62           | 0.17            |
| Peak 30 cadence |              | 1               | 0.88           | 0.77            |
| Peak 1 cadence  |              |                 | 1              | 0.63            |

All p-values <0.001.



Table S14. All-cause mortality rates (per 1,000 adults/year) for the joint associations between steps per day and stepping intensity.

|                                           | Steps/day         |                   |                  |                 |
|-------------------------------------------|-------------------|-------------------|------------------|-----------------|
|                                           | <4000             | 4000-7999         | 8000-11999       | 12000+          |
|                                           | MR (95% CI)       | MR (95% CI)       | MR (95% CI)      | MR (95% CI)     |
| <b>Bout cadence (steps per minute)</b>    |                   |                   |                  |                 |
| No bouts                                  | 23.3 (18.6, 28.0) | 16.8 (10.1, 23.5) | 22.5 (0.0, 54.2) | -               |
| 60.0-76.0                                 | 14.9 (8.2, 21.6)  | 8.9 (6.9, 10.9)   | 6.6 (1.7, 11.5)  | 5.4 (0.0, 16.5) |
| 76.1-81.0                                 | 11.9 (5.4, 18.3)  | 9.2 (6.3, 12.1)   | 5.5 (1.7, 9.2)   | 5.0 (0.0, 17.5) |
| 81.1-88.5                                 | 14.9 (0.0, 30.4)  | 10.1 (6.1, 14.2)  | 5.6 (0.9, 10.2)  | 5.4 (0.0, 19.4) |
| 88.6-155.0                                | 15.6 (4.7, 26.6)  | 10.8 (4.4, 17.3)  | 5.7 (0.9, 10.3)  | 5.1 (0.0, 14.3) |
| <b>Peak 30 cadence (steps per minute)</b> |                   |                   |                  |                 |
| No bouts                                  | 23.5 (18.6, 28.4) | 16.8 (9.8, 23.7)  | 22.5 (0.0, 53.5) | -               |
| 18.5-56.0                                 | 14.3 (8.7, 19.8)  | 10.0 (8.0, 12.0)  | 8.3 (0.0, 22.4)  | -               |
| 56.1-69.2                                 | 21.4 (0.0, 57.4)  | 9.4 (6.4, 12.3)   | 6.2 (1.7, 10.6)  | 3.6 (0.0, 14.2) |
| 69.3-82.8                                 | -                 | 7.9 (1.2, 14.6)   | 5.6 (1.3, 9.8)   | 5.7 (0.0, 16.9) |
| 82.9-149.5                                | -                 | 8.9 (0.0, 23.2)   | 5.4 (1.1, 9.6)   | 4.9 (0.0, 12.5) |
| <b>Peak 1 cadence (steps per minute)</b>  |                   |                   |                  |                 |
| No bouts                                  | 23.3 (18.3, 28.2) | 16.8 (10.1, 23.5) | 22.6 (0.0, 55.0) | -               |
| 39.2-89.9                                 | 14.0 (8.2, 19.8)  | 9.2 (7.4, 11.0)   | 7.2 (0.9, 13.4)  | 6.5 (0.0, 22.1) |
| 90.0-101.9                                | 13.6 (4.4, 22.7)  | 9.7 (5.7, 13.7)   | 6.4 (1.9, 10.9)  | 5.2 (0.0, 16.6) |
| 102.0-112.4                               | 25.9 (0.0, 58.7)  | 9.1 (5.8, 12.5)   | 5.0 (1.4, 8.6)   | 5.1 (0.0, 20.3) |
| 112.5-173.3                               | 15.1 (0.0, 51.7)  | 12.4 (4.6, 20.3)  | 5.7 (1.5, 9.9)   | 5.2 (0.0, 16.2) |

Step intensity was defined as:

Bout cadence: average steps per minute in a day in bouts of 2 consecutive minutes or greater;

Peak 30 cadence: average steps per minute recorded for the 30 highest minutes in a day (not required to be consecutive);

Peak 1 cadence: average steps per minute recorded for the highest minute in a day

No bouts – No bouts of 2 consecutive minutes or greater; 496 participants did not accumulate a single bout of 2 consecutive minutes or greater and were flagged for each stepping intensity metric results in order to facilitate direct comparisons.

Mortality rates (MR) were adjusted for age, diet quality, sex, race-ethnicity, BMI, education, alcohol consumption, smoking status, diabetes, stroke, coronary heart disease, heart failure, cancer, chronic bronchitis, emphysema, mobility limitation, and self-reported general health. Rates were computed using the 2003 mortality rate for US adults (11.4 deaths per 1000 adults/year). Models included US population and study design weights to account for the complex survey design and models were replicated 5 times to account for imputed steps data. Confidence intervals were calculated as  $\pm 1.96$  standard errors and values were truncated to 0 when confidence intervals were negative.

Table S15. Adjusted hazard ratios and mortality rates for CVD and Cancer mortality

|           | CVD                      | Cancer                   |
|-----------|--------------------------|--------------------------|
| Steps/day | Hazard ratios (95% CI)   | Hazard ratios (95% CI)   |
| 2000      | 1.51 (1.32, 1.72)        | 1.23 (1.09, 1.53)        |
| 4000      | REFERENT                 | REFERENT                 |
| 6000      | 0.68 (0.60, 0.76)        | 0.82 (0.72, 0.92)        |
| 8000      | 0.49 (0.40, 0.60)        | 0.67 (0.54, 0.82)        |
| 10000     | 0.40 (0.30, 0.52)        | 0.55 (0.42, 0.72)        |
| 12000     | 0.35 (0.24, 0.52)        | 0.45 (0.31, 0.66)        |
| 14000     | 0.34 (0.24, 0.52)        | 0.37 (0.21, 0.66)        |
| 16000     | 0.34 (0.15, 0.77)        | 0.31 (0.14, 0.70)        |
|           |                          |                          |
| Steps/day | Mortality rates (95% CI) | Mortality rates (95% CI) |
| 2000      | 7.3 (6.2, 8.4)           | 4.9 (3.8, 5.9)           |
| 4000      | 4.6 (3.9, 5.4)           | 4.0 (3.2, 3.8)           |
| 6000      | 3.0 (2.2, 3.9)           | 3.3 (2.8, 3.8)           |
| 8000      | 2.1 (1.1, 3.2)           | 2.7 (2.0, 3.4)           |
| 10000     | 1.7 (0.7, 2.7)           | 2.4 (1.7, 3.1)           |
| 12000     | 1.5 (0.6, 2.4)           | 2.2 (1.3, 3.1)           |
| 14000     | 1.5 (0.4, 2.6)           | 2.1 (0.6, 3.5)           |
| 16000     | 1.6 (0.1, 3.0)           | 2.0 (0.0, 4.0)           |

Hazard ratios and mortality rates were adjusted for age, diet quality, sex, race-ethnicity, BMI, education, alcohol consumption, smoking status, diabetes, stroke, coronary heart disease, heart failure, cancer, chronic bronchitis, emphysema, mobility limitation, and self-reported general health. . Estimated hazard ratios were computed separately for cardiovascular disease (CVD) and cancer using cox proportional hazards model with restricted cubic spline functions using 3 knots (at 5<sup>th</sup>, 50<sup>th</sup>, and 95<sup>th</sup> of US weighted percentiles for steps per day equivalent to approximately 3 000, 9 000, and 16 000 steps per day). The ~10<sup>th</sup> percentile was set as the referent group (referent=4 000 steps/day). Mortality rates were computed using 2003 mortality rates for US adults (CVD, 3.9 deaths per 1000 adults/year; Cancer, 3.3 deaths per 1000 adults/year). Models included US population and study design weights to account for the complex survey design in NHANES. All models were replicated 5 times to account for imputed steps generated in ~14% of the sample.

Table S16. Adjusted hazard ratios for **cardiovascular disease mortality** across quartiles of stepping intensity

| Quartiles                          |                   | 1          | 2                 | 3                 | 4                 |         |
|------------------------------------|-------------------|------------|-------------------|-------------------|-------------------|---------|
| Bout cadence (steps per minute)    | No bouts          | 60-76.0    | 76.1-81.0         | 81.1-88.5         | >88.5             |         |
|                                    | (n=496)           | (n=1,129)  | (n=1,023)         | (n=1,116)         | (n=1,076)         | p trend |
| N deaths                           | 127               | 90         | 68                | 69                | 52                |         |
| Model 1                            | 2.26 (1.69, 3.01) | 1.00 (REF) | 1.03 (0.65, 1.62) | 1.06 (0.77, 1.45) | 0.82 (0.54, 1.24) | 0.63    |
| Model 2                            | 1.80 (1.30, 2.49) | 1.00 (REF) | 1.07 (0.67, 1.69) | 1.10 (0.80, 1.50) | 0.94 (0.63, 1.40) | 0.99    |
| Peak 30 cadence (steps per minute) | No bouts          | 0-56.0     | 56.1-69.2         | 69.3-82.8         | >82.8             |         |
|                                    | (n=496)           | (n=1,080)  | (n=1,153)         | (n=1,074)         | (n=1,037)         | p trend |
| N deaths                           | 127               | 144        | 66                | 35                | 34                |         |
| Model 1                            | 1.95 (1.53, 2.49) | 1.00 (REF) | 0.66 (0.48, 0.91) | 0.61 (0.38, 0.98) | 0.40 (0.24, 0.67) | 0.002   |
| Model 2                            | 1.73 (1.30, 2.29) | 1.00 (REF) | 0.82 (0.56, 1.20) | 0.89 (0.52, 1.53) | 0.69 (0.35, 1.38) | 0.13    |
| Peak 1 cadence (steps per minute)  | No bouts          | 0-89.9     | 90.0-101.9        | 102.0-112.4       | >112.4            |         |
|                                    | (n=496)           | (n=1,055)  | (n=1,141)         | (n=1,065)         | (n=1,083)         | p trend |
| N deaths                           | 127               | 133        | 65                | 48                | 33                |         |
| Model 1                            | 1.87 (1.45, 2.40) | 1.00 (REF) | 0.61 (0.42, 0.89) | 0.59 (0.36, 0.98) | 0.50 (0.28, 0.88) | 0.006   |
| Model 2                            | 1.63 (1.22, 2.16) | 1.00 (REF) | 0.71 (0.49, 1.03) | 0.75 (0.45, 1.24) | 0.72 (0.38, 1.36) | 0.09    |

Step intensity was defined using quartiles of:

Bout cadence: average steps per minute in a day in bouts of 2 consecutive minutes or greater;

Peak 30 cadence: average steps per minute recorded for the 30 highest minutes in a day (not required to be consecutive);

Peak 1 cadence: average steps per minute recorded for the highest minute in a day

No bouts – No bouts of 2 consecutive minutes or greater; 178 male participants did not accumulate a single bout of 2 consecutive minutes or greater and were flagged for each stepping intensity metric results in order to facilitate direct comparisons.

Model 1 – age, diet quality, sex, race-ethnicity, BMI, education, alcohol consumption, smoking status, diabetes, stroke, coronary heart disease, heart failure, cancer, chronic bronchitis, emphysema, mobility limitation, self-reported general health, and stepping intensity

Model 2 – Model 1 + steps per day (continuous)

P trend was computed separately for each model 1 and 2 and did not include the no bout group.

Table S17. Adjusted hazard ratios for **cancer mortality** across quartiles of stepping intensity

| Quartiles                          |                   | 1          | 2                 | 3                 | 4                 |         |
|------------------------------------|-------------------|------------|-------------------|-------------------|-------------------|---------|
| Bout cadence (steps per minute)    | No bouts          | 60-76.0    | 76.1-81.0         | 81.1-88.5         | >88.5             |         |
|                                    | (n=496)           | (n=1,129)  | (n=1,023)         | (n=1,116)         | (n=1,076)         | p trend |
| N deaths                           | 47                | 70         | 48                | 69                | 49                |         |
| Model 1                            | 1.26 (0.73, 2.18) | 1.00 (REF) | 1.07 (0.72, 1.60) | 1.45 (0.91, 2.29) | 1.31 (0.74, 2.31) | 0.20    |
| Model 2                            | 1.07 (0.56, 2.02) | 1.00 (REF) | 1.10 (0.74, 1.63) | 1.49 (0.94, 2.35) | 1.41 (0.82, 2.40) | 0.12    |
| Peak 30 cadence (steps per minute) | No bouts          | 0-56.0     | 56.1-69.2         | 69.3-82.8         | >82.8             |         |
|                                    | (n=496)           | (n=1,080)  | (n=1,153)         | (n=1,074)         | (n=1,037)         | p trend |
| N deaths                           | 47                | 91         | 67                | 44                | 34                |         |
| Model 1                            | 1.08 (0.64, 1.83) | 1.00 (REF) | 1.12 (0.75, 1.66) | 0.72 (0.42, 1.23) | 0.71 (0.33, 1.54) | 0.35    |
| Model 2                            | 0.98 (0.55, 1.74) | 1.00 (REF) | 1.33 (0.87, 2.04) | 0.98 (0.58, 1.67) | 1.13 (0.54, 2.35) | 0.62    |
| Peak 1 cadence (steps per minute)  | No bouts          | 0-89.9     | 90.0-101.9        | 102.0-112.4       | >112.4            |         |
|                                    | (n=496)           | (n=1,055)  | (n=1,141)         | (n=1,065)         | (n=1,083)         | p trend |
| N deaths                           | 47                | 77         | 73                | 40                | 46                |         |
| Model 1                            | 1.24 (0.75, 2.04) | 1.00 (REF) | 1.42 (0.99, 2.05) | 1.00 (0.62, 1.60) | 1.32 (0.78, 2.23) | 0.32    |
| Model 2                            | 1.06 (0.60, 1.89) | 1.00 (REF) | 1.67 (1.13, 2.48) | 1.30 (0.79, 2.15) | 1.91 (1.10, 3.31) | 0.03    |

Step intensity was defined using quartiles of:

Bout cadence: average steps per minute in a day in bouts of 2 consecutive minutes or greater;

Peak 30 cadence: average steps per minute recorded for the 30 highest minutes in a day (not required to be consecutive);

Peak 1 cadence: average steps per minute recorded for the highest minute in a day

No bouts – No bouts of 2 consecutive minutes or greater; 178 male participants did not accumulate a single bout of 2 consecutive minutes or greater and were flagged for each stepping intensity metric results in order to facilitate direct comparisons.

Model 1 – age, diet quality, sex, race-ethnicity, BMI, education, alcohol consumption, smoking status, diabetes, stroke, coronary heart disease, heart failure, cancer, chronic bronchitis, emphysema, mobility limitation, and self-reported general health, and stepping intensity

Model 2 – Model 1 + steps per day

P trend was computed separately for each model 1 and 2 and did not include the no bout group.

Table S18. Adjusted hazard ratios for steps per day and mortality (8000 vs. 4000 steps/day) in the analytic sample and in complete case analysis\*, US adults aged 40+.

|                     | <b>8000 vs. 4000 steps/day</b> |                                      |
|---------------------|--------------------------------|--------------------------------------|
|                     | Analytic sample<br>(N=4,840)   | Complete case analysis*<br>(n=4,416) |
| All-cause mortality | 0.49 (0.44, 0.55)              | 0.48 (0.42, 0.55)                    |
| CVD mortality       | 0.49 (0.40, 0.60)              | 0.48 (0.40, 0.58)                    |
| Cancer mortality    | 0.67 (0.54, 0.82)              | 0.63 (0.50, 0.80)                    |
| Men                 | 0.48 (0.41, 0.58)              | 0.46 (0.38, 0.56)                    |
| Women               | 0.48 (0.37, 0.62)              | 0.49 (0.36, 0.65)                    |
| 40-49yrs            | 0.58 (0.35, 0.96)              | 0.55 (0.28, 1.08)                    |
| 50-64yrs            | 0.39 (0.27, 0.58)              | 0.40 (0.27, 0.59)                    |
| 65+yrs              | 0.38 (0.32, 0.44)              | 0.37 (0.31, 0.43)                    |
| Non-Hispanic White  | 0.48 (0.42, 0.55)              | 0.48 (0.41, 0.56)                    |
| Non-Hispanic Black  | 0.45 (0.35, 0.59)              | 0.46 (0.33, 0.64)                    |
| Mexican-American    | 0.66 (0.45, 0.98)              | 0.68 (0.43, 1.09)                    |

\*Complete case analysis excluded participants with any missing covariate information

Hazard ratios were adjusted for age, diet quality, sex, race-ethnicity, BMI, education, alcohol consumption, smoking status, diabetes, stroke, coronary heart disease, heart failure, cancer, chronic bronchitis, emphysema, mobility limitation, and self-reported general health. Estimated hazard ratios were computed using a cox proportional hazards model with restricted cubic spline functions.

Table S19. Adjusted hazard ratios for stepping intensity and all-cause mortality (Quartile 4 vs. 1) in the analytic sample and in complete case analysis\*, US adults aged 40+.

|                 | <b>Quartile 4 vs. Quartile 1</b>     |                                              |
|-----------------|--------------------------------------|----------------------------------------------|
|                 | <b>Analytic sample<br/>(N=4,840)</b> | <b>Complete case analysis*<br/>(n=4,416)</b> |
| Bout cadence    | 1.07 (0.88, 1.29)                    | 1.15 (0.92, 1.44)                            |
| Peak 30 cadence | 0.90 (0.65, 1.27)                    | 0.97 (0.68, 1.39)                            |
| Peak 1 cadence  | 1.10 (0.81, 1.49)                    | 1.16 (0.83, 1.62)                            |

\*Complete case analysis excluded participants with any missing covariate information

Step intensity was defined using quartiles of:

Bout cadence: average steps per minute in a day in bouts of 2 consecutive minutes or greater;

Peak 30 cadence: average steps per minute recorded for the 30 highest minutes in a day (not required to be consecutive);

Peak 1 cadence: average steps per minute recorded for the highest minute in a day

Hazard ratios were adjusted for age, diet quality, sex, race-ethnicity, BMI, education, alcohol consumption, smoking status, diabetes, stroke, coronary heart disease, heart failure, cancer, chronic bronchitis, emphysema, mobility limitation, self-reported general health, and steps per day (continuous)

Figure S1. Adjusted hazard ratios for all-cause mortality stratified by education and behavioral risk factors (smoking, alcohol consumption, and healthy eating index).

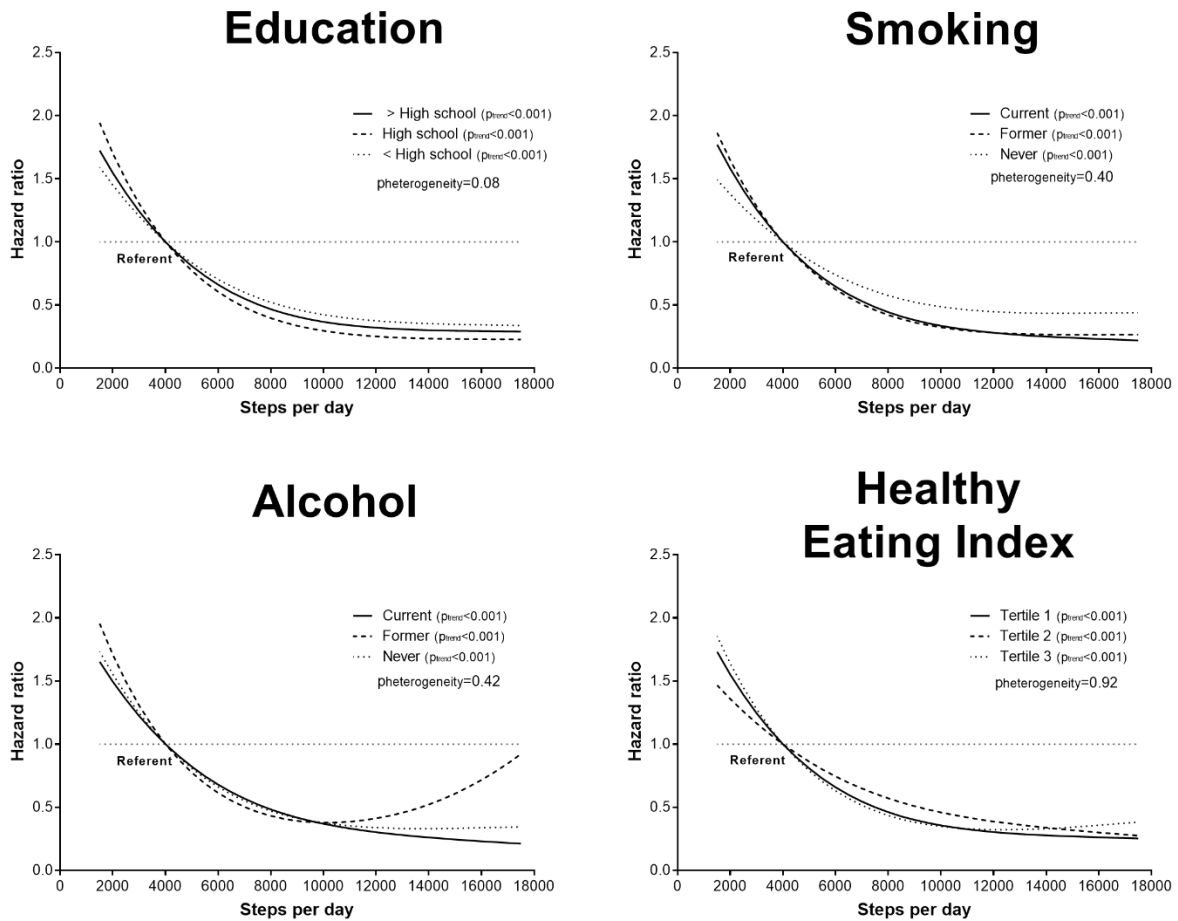

Hazard ratios were adjusted for including age, diet quality, sex, race-ethnicity, BMI, education, alcohol consumption, smoking status, diabetes, stroke, coronary heart disease, heart failure, cancer, chronic bronchitis, emphysema, mobility limitation, and self-reported general health (not including the respective confounder of interest). Estimated hazard ratios were computed separately for each level of the confounder of interest using cox proportional hazards model with restricted cubic spline functions using 3 knots (at 5<sup>th</sup>, 50<sup>th</sup>, and 95<sup>th</sup> of US weighted percentiles for steps per day equivalent to approximately 3 000, 9 000, and 16 000 steps per day). The ~10<sup>th</sup> percentile was set as the referent group (referent=4 000 steps/day; horizontal dotted line). Models included US population and study design weights to account for the complex survey design in NHANES. All models were replicated 5 times to account for imputed steps generated in ~14% of the sample.

Figure S2. Adjusted hazard ratios for all-cause mortality stratified by prevalent comorbid conditions.

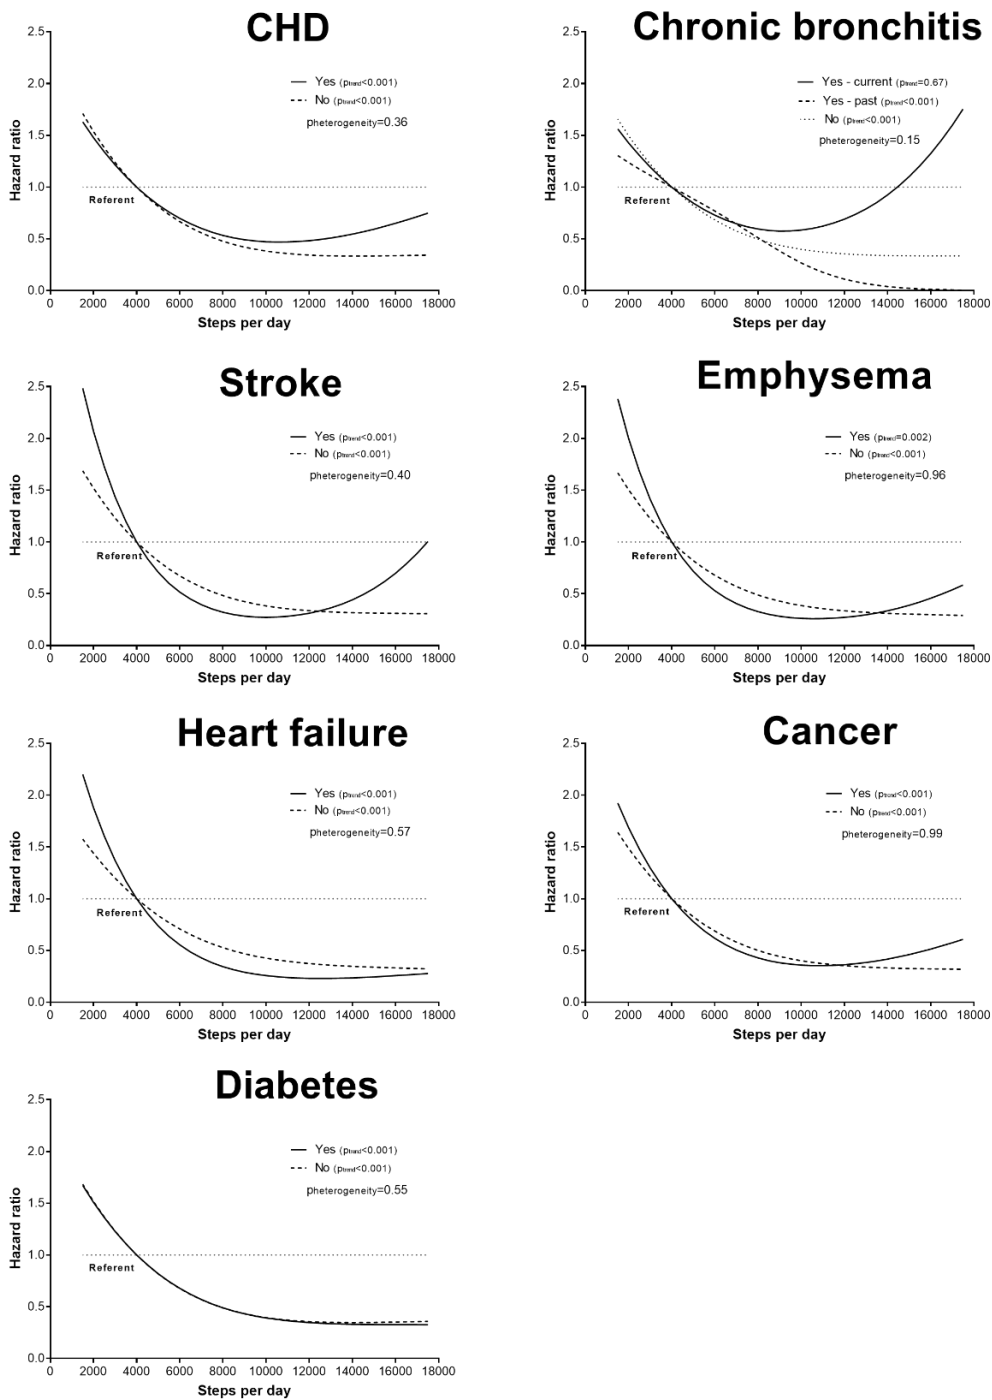

Hazard ratios were adjusted for age, diet quality, sex, race-ethnicity, BMI, education, alcohol consumption, smoking status, diabetes, stroke, coronary heart disease, heart failure, cancer, chronic bronchitis, emphysema, mobility limitation, and self-reported general health (not including the respective chronic condition of interest). Estimated hazard ratios were computed separately for diabetes, coronary heart disease, and cancer condition using cox proportional hazards model with restricted cubic spline functions using 3 knots (at 5<sup>th</sup>, 50<sup>th</sup>, and 95<sup>th</sup> of US weighted percentiles for steps per day equivalent to approximately 3 000, 9 000, and 16 000 steps per day). The ~10<sup>th</sup> percentile was set as the referent group (referent=4 000 steps/day; horizontal dotted line). Models included US population and study design weights to account for the complex survey design in NHANES. All models were replicated 5 times to account for imputed steps generated in ~14% of the sample.



Figure S3. Adjusted hazard ratios for all-cause mortality stratified by mobility limitation, self-reported general health, ability to accumulate extended stepping bouts, and length of follow-up.

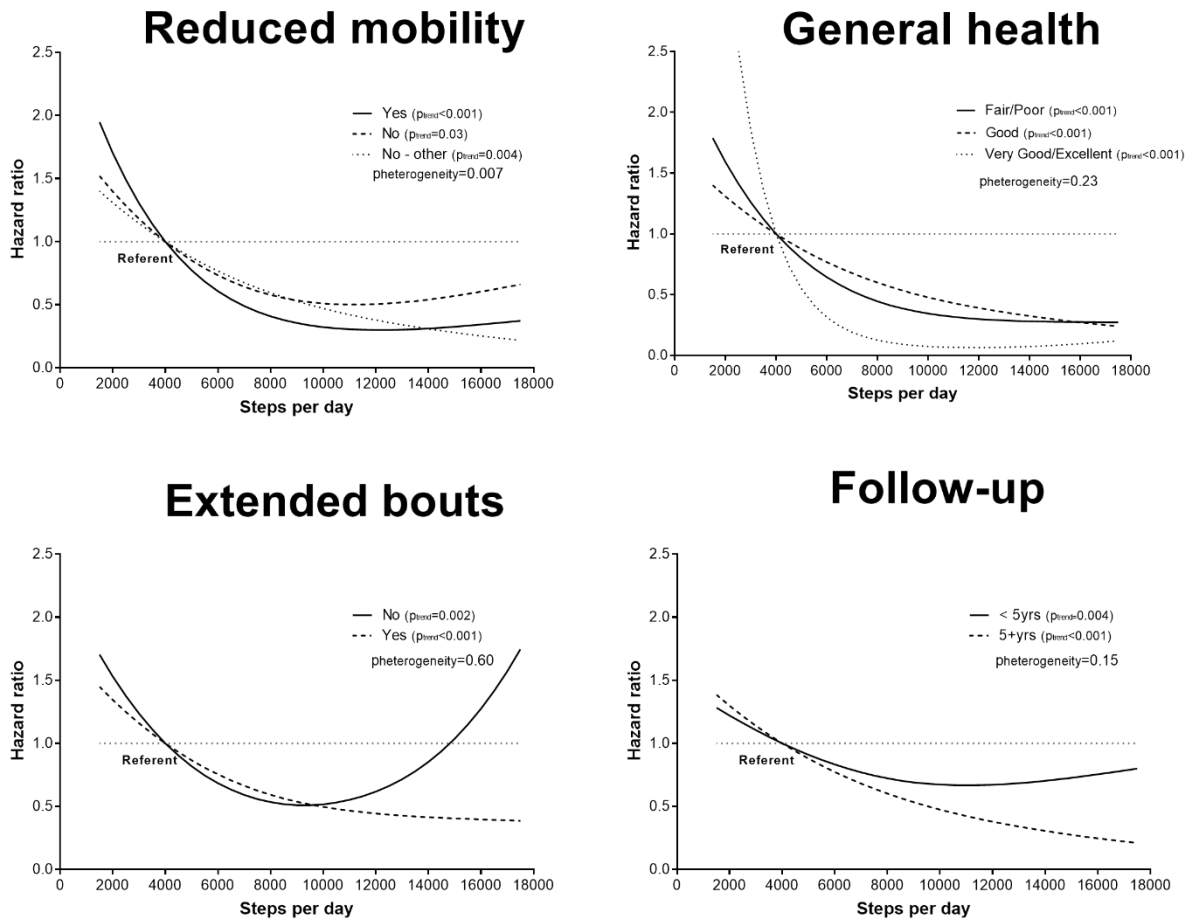

Hazard ratios were adjusted for age, diet quality, sex, race-ethnicity, BMI, education, alcohol consumption, smoking status, diabetes, stroke, coronary heart disease, heart failure, cancer, chronic bronchitis, emphysema, mobility limitation, and self-reported general health (not including the respective variable of interest). Estimated hazard ratios were computed separately for each level of the reverse causality variable using cox proportional hazards model with restricted cubic spline functions using 3 knots (at 5<sup>th</sup>, 50<sup>th</sup>, and 95<sup>th</sup> of US weighted percentiles for steps per day equivalent to approximately 3 000, 9 000, and 16 000 steps per day). The ~10<sup>th</sup> percentile was set as the referent group (referent=4 000 steps/day; horizontal dotted line). Models included US population and study design weights to account for the complex survey design in NHANES. All models were replicated 5 times to account for imputed steps generated in ~14% of the sample.

Figure S4. Adjusted hazard ratios for all-cause mortality among adults with and without imputed steps.

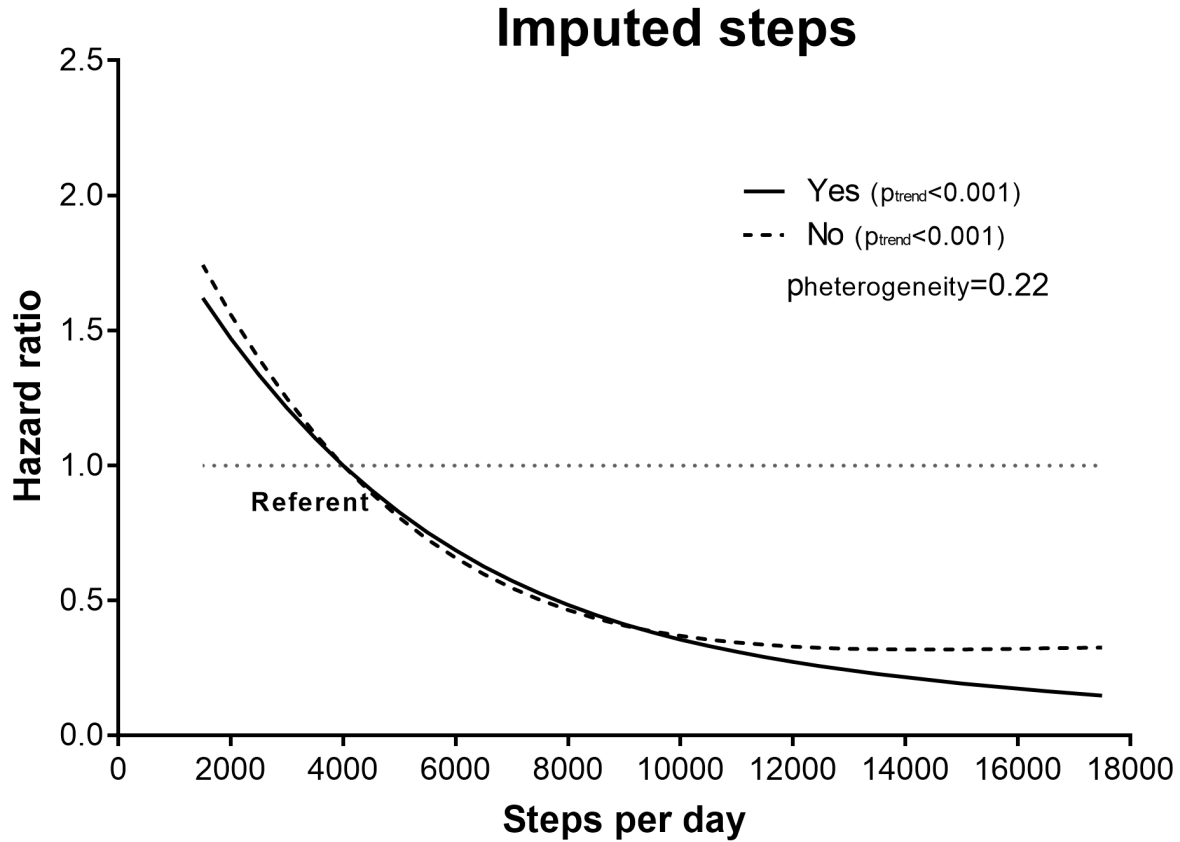

Hazard ratios were adjusted for age, diet quality, sex, race-ethnicity, BMI, education, alcohol consumption, smoking status, diabetes, stroke, coronary heart disease, heart failure, cancer, chronic bronchitis, emphysema, mobility limitation, and self-reported general health. Estimated hazard ratios were computed separately for individuals with and without imputed steps using cox proportional hazards model with restricted cubic spline functions using 3 knots (at 5<sup>th</sup>, 50<sup>th</sup>, and 95<sup>th</sup> of US weighted percentiles for steps per day equivalent to approximately 3 000, 9 000, and 16 000 steps per day). The ~10<sup>th</sup> percentile was set as the referent group (referent=4 000 steps/day; horizontal dotted line). Models included US population and study design weights to account for the complex survey design in NHANES. The model using individuals with imputed steps was replicated 5 times to account for imputed steps generated in this subgroup.
